# Supplementary material for: Nucleobase-monofunctionalized supramolecular poly(l-lactide): controlled synthesis, competitive crystallization, and structural organization
Source: Royal Society of Chemistry journal article supplement (doi:10.1039/d1py00288k), 2021-01-01
Supplement: d1py00288k1.pdf [file d1py00288k1.pdf]

## Supplementary Information

# **Nucleobase-Monofunctionalized Supramolecular Poly(L-lactide): Controlled Synthesis, Competitive Crystallization, and Structural Organization**

*Xing Li<sup>a</sup>, Lingling Ni<sup>a</sup>, Chenxuan Sun<sup>a</sup>, Wenqing Xu<sup>a</sup>, Ying Zheng<sup>a,b</sup>, Guorong Shan<sup>a,b</sup>,  
Yongzhong Bao<sup>a,b</sup>, Pengju Pan<sup>\*a,b</sup>*

*<sup>a</sup>State Key Laboratory of Chemical Engineering, College of Chemical and Biological Engineering, Zhejiang University, 38 Zheda Road, Hangzhou 310027, China*

*<sup>b</sup>Institute of Zhejiang University-Quzhou, 78 Jiu Hua Boulevard North, Quzhou, 324000, China*

*\*Corresponding author. email: panpengju@zju.edu.cn*

## Experimental

**Synthesis of nonfunctionalized PLLA.** A typical synthetic procedure of nonfunctionalized PLLA with a designed  $M_n$  of 2.0 kDa is shown as follows. Benzyl alcohol (0.54 g, 0.005 mol) and L-lactide (9.44 g, 0.066 mol) were added into a flask and further dried under reduced pressure at 60 °C for 1 h, followed by the addition of  $\text{Sn}(\text{Oct})_2$  (0.04 g, 0.10 mmol). Polymerization was allowed to proceed at 120 °C for 12 h under an argon atmosphere. After reaction, the reaction mixture was precipitated into excess of cold ether (250 mL); the precipitate was dried at 50 °C *in vacuo* for 24 h to attain the benzyl-terminated PLLA, denoted as the nonfunctionalized PLLA. Nonfunctionalized PLLA was coded as  $\text{PLLA}_{xk}$ , with  $x$  representing the  $M_{n,\text{PLLA}}$  (in kDa) of PLLA block measured by  $^1\text{H}$  NMR.  $^1\text{H}$  NMR of  $\text{PLLA}_{1.9k}$  ( $\text{CDCl}_3$ ):  $\delta = 7.34$  (t, 5H,  $-\text{C}_6\text{H}_5$ ), 5.18 (t, 28H,  $-\text{CH}(\text{CH}_3)-\text{O}-$ ), 4.37 (t, 1H,  $-\text{CH}(\text{CH}_3)-\text{OH}$ ), 1.75–1.25 (m, 87H,  $-\text{CH}-\text{CH}_3-$ ).

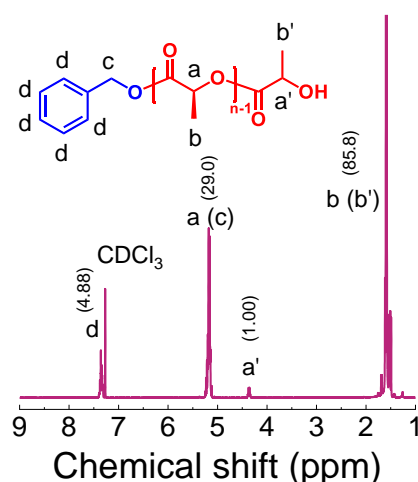

**Fig. S1**  $^1\text{H}$  NMR spectra of nonfunctionalized  $\text{PLLA}_{1.9k}$ . The numerals in brackets denote the integrated area of each peak.

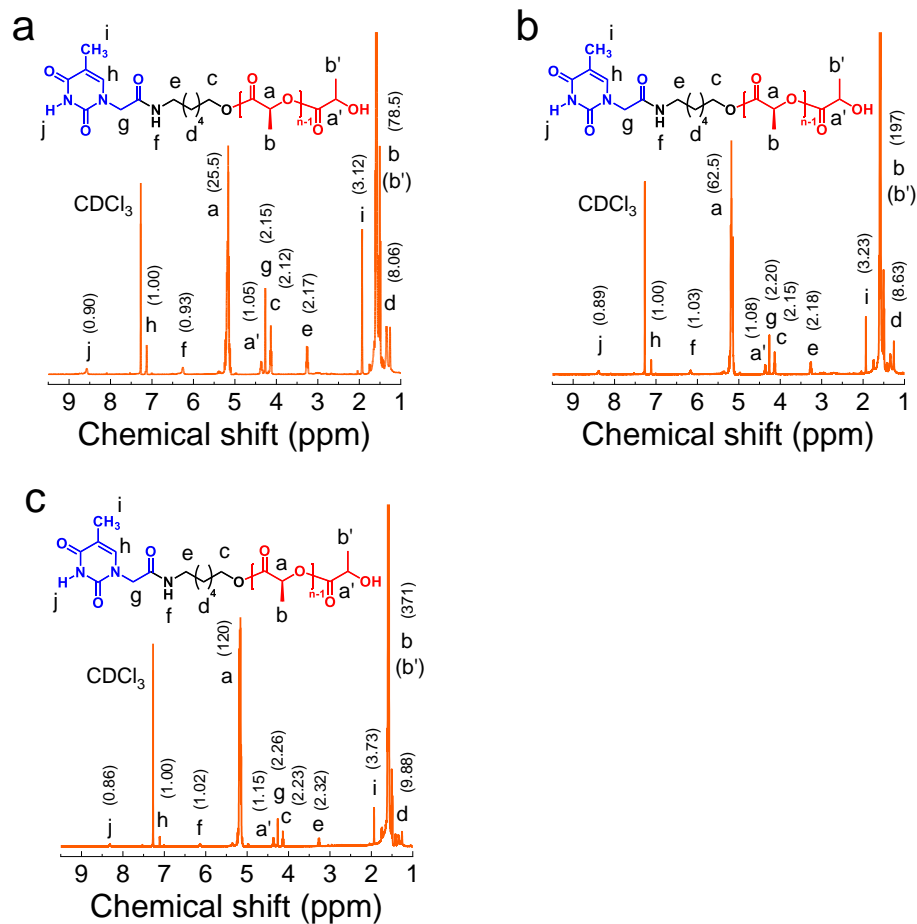

**Fig. S2**  $^1\text{H}$  NMR spectra of (a) PLLA<sub>1.7k</sub>-Thy; (b) PLLA<sub>4.1k</sub>-Thy; (c) PLLA<sub>7.4k</sub>-Thy. The numerals in brackets denote the integrated area of each peak.

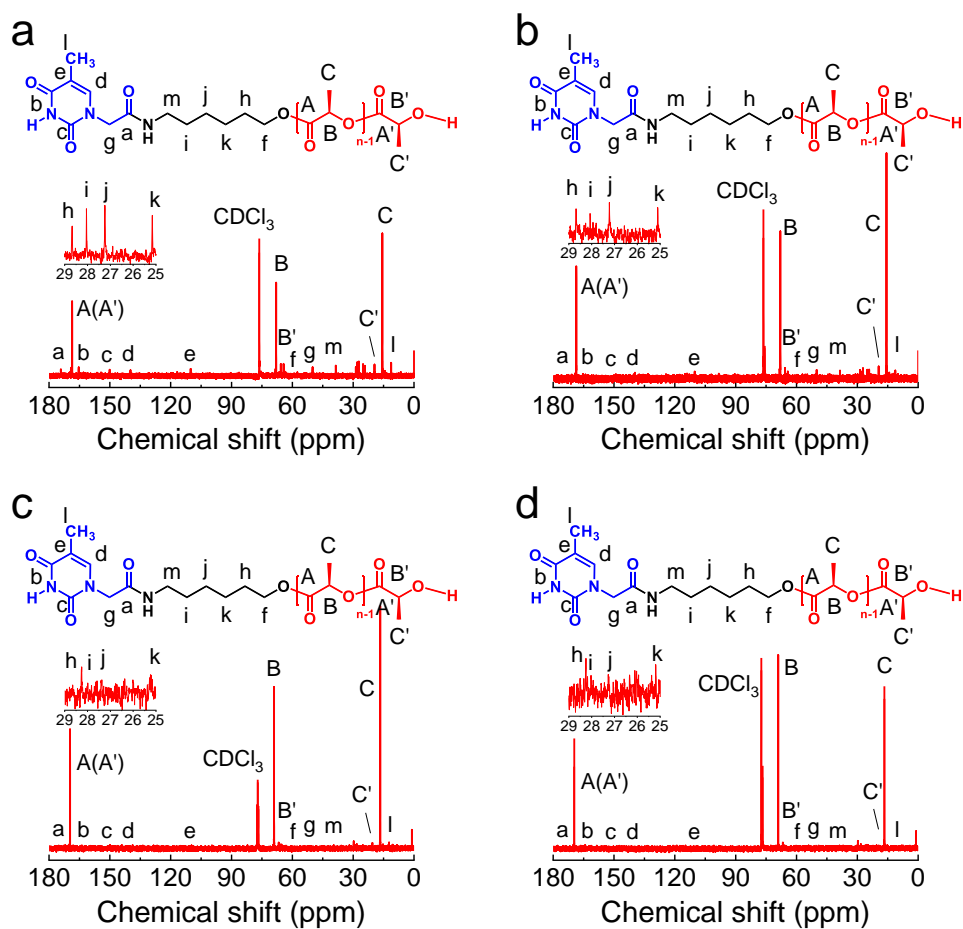

**Fig. S3**  $^{13}\text{C}$  NMR spectra of (a) PLLA<sub>0.8k</sub>-Thy; (b) PLLA<sub>1.7k</sub>-Thy; (c) PLLA<sub>4.1k</sub>-Thy; (d) PLLA<sub>7.4k</sub>-Thy.

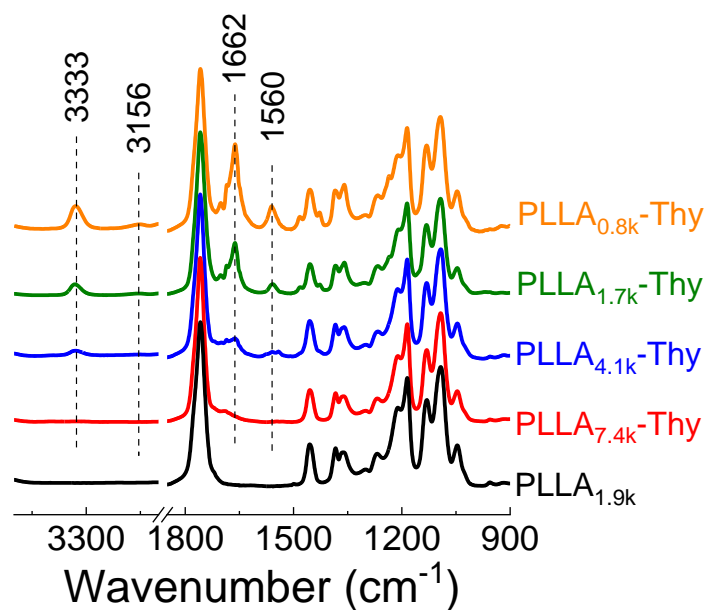

**Fig. S4** FTIR spectra of PLLA-Thy and nonfunctionalized PLLA.

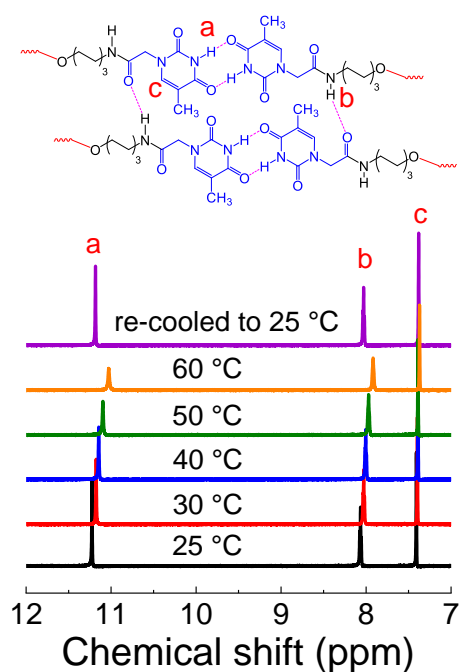

**Fig. S5** Temperature-dependent  $^1\text{H}$  NMR spectra of PLLA<sub>1.7k</sub>-Thy in DMSO- $d_6$ .

Sample was equilibrated for 10 min at each temperature before measurement.

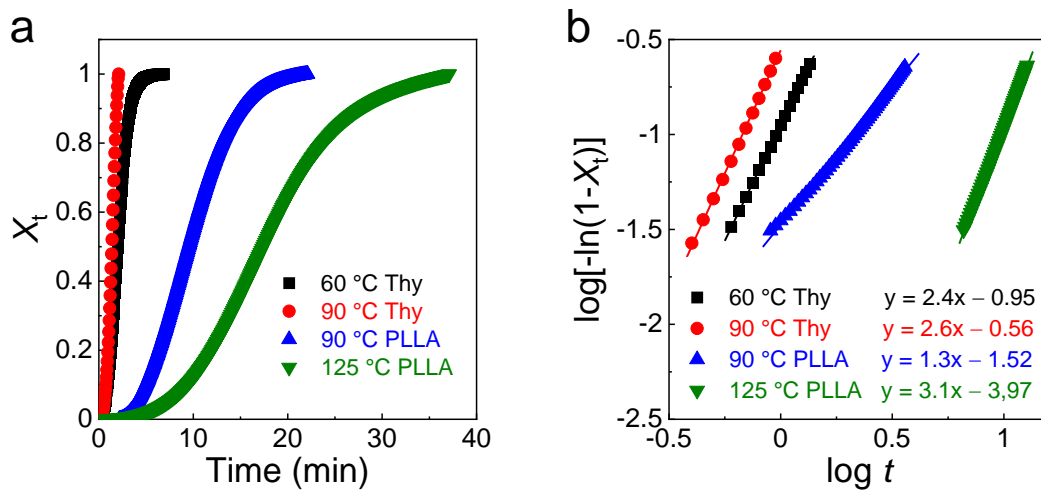

**Fig. S6** Analysis of isothermal crystallization kinetics of PLLA<sub>1.7k</sub>-Thy at different  $T_c$ 's. (a) Changes of relative crystallinity ( $X_t$ ) of thymine unit and PLLA block; (b) Plot of  $\lg[-\ln(1-X_t)]$  against  $\lg t$ .

**Table S1.** Scattering data of PLLA<sub>0.8k</sub>-Thy after isothermal melt crystallization at different  $T_c$ 's.

| $T_c$<br>(°C) | Characteristic reflection | $q$<br>(nm <sup>-1</sup> ) | $d^a$<br>(nm) |
|---------------|---------------------------|----------------------------|---------------|
| 60            | Thy                       | 13.3                       | 0.47          |
|               |                           | 16.7                       | 0.38          |
| 70            | Thy                       | 13.3                       | 0.47          |
|               |                           | 16.7                       | 0.38          |
| 80            | Thy                       | 13.3                       | 0.47          |
|               |                           | 16.7                       | 0.38          |
| 90            | Thy                       | 13.3                       | 0.47          |
|               |                           | 16.7                       | 0.38          |
| 100           | Thy                       | 13.3                       | 0.47          |
|               |                           | 16.7                       | 0.38          |
|               | PLLA $\alpha_{110/200}$   | 13.5                       | 0.47          |
|               | PLLA $\alpha_{203}$       | 15.3                       | 0.41          |
|               | Thy                       | 13.3                       | 0.47          |
| 110           | PLLA $\alpha_{110/200}$   | 16.7                       | 0.38          |
|               |                           | 13.5                       | 0.47          |
|               | PLLA $\alpha_{203}$       | 15.3                       | 0.41          |
|               | Thy                       | 13.3                       | 0.47          |
| 120           | Thy                       | 16.7                       | 0.38          |
|               |                           | 13.5                       | 0.47          |
|               | PLLA $\alpha_{110/200}$   | 13.5                       | 0.47          |
|               | PLLA $\alpha_{203}$       | 15.3                       | 0.41          |

<sup>a</sup> $d$  was evaluated from the  $q$  value of characteristic reflection by Bragg equation ( $d = 2\pi/q$ ).

**Table S2.** Scattering data of PLLA<sub>1.7k</sub>-Thy after isothermal melt crystallization at different  $T_c$ 's.

| $T_c$<br>(°C) | Characteristic reflection         | $q$<br>(nm <sup>-1</sup> ) | $d^a$<br>(nm) |
|---------------|-----------------------------------|----------------------------|---------------|
| 60            | Thy                               | 13.3                       | 0.47          |
|               |                                   | 16.7                       | 0.38          |
| 70            | Thy                               |                            | masked        |
|               | PLLA $\alpha'$ <sub>110/200</sub> | 13.3                       | 0.47          |
|               | PLLA $\alpha'$ <sub>203</sub>     | 15.2                       | 0.41          |
|               | Thy                               |                            | masked        |
| 80            | PLLA $\alpha'$ <sub>110/200</sub> | 13.3                       | 0.47          |
|               | PLLA $\alpha'$ <sub>203</sub>     | 15.2                       | 0.41          |
|               | Thy                               |                            | masked        |
|               | Thy                               |                            | masked        |
| 90            | PLLA $\alpha$ <sub>110/200</sub>  | 13.5                       | 0.47          |
|               | PLLA $\alpha$ <sub>203</sub>      | 15.3                       | 0.41          |
|               | Thy                               |                            | masked        |
|               | Thy                               |                            | masked        |
| 100           | PLLA $\alpha$ <sub>110/200</sub>  | 13.5                       | 0.47          |
|               | PLLA $\alpha$ <sub>203</sub>      | 15.3                       | 0.41          |
|               | Thy                               |                            | masked        |
|               | Thy                               |                            | masked        |
| 110           | PLLA $\alpha$ <sub>110/200</sub>  | 13.5                       | 0.47          |
|               | PLLA $\alpha$ <sub>203</sub>      | 15.3                       | 0.41          |
|               | Thy                               |                            | masked        |
|               | Thy                               |                            | masked        |
| 120           | PLLA $\alpha$ <sub>110/200</sub>  | 13.5                       | 0.47          |
|               | PLLA $\alpha$ <sub>203</sub>      | 15.3                       | 0.41          |
|               | Thy                               |                            | masked        |
|               | Thy                               |                            | masked        |

<sup>a</sup> $d$  was evaluated from the  $q$  value of characteristic reflection by Bragg equation ( $d = 2\pi/q$ ).



**Table S3.** Scattering data of PLLA<sub>4.1k</sub>-Thy after isothermal melt crystallization at different  $T_c$ 's.

| $T_c$<br>(°C) | Characteristic reflection | $q$<br>(nm <sup>-1</sup> ) | $d^a$<br>(nm) |
|---------------|---------------------------|----------------------------|---------------|
| 60            | PLLA $\alpha'_{110/200}$  | 13.3                       | 0.47          |
|               | PLLA $\alpha'_{203}$      | 15.2                       | 0.41          |
| 70            | PLLA $\alpha'_{110/200}$  | 13.3                       | 0.47          |
|               | PLLA $\alpha'_{203}$      | 15.2                       | 0.41          |
| 80            | PLLA $\alpha'_{110/200}$  | 13.3                       | 0.47          |
|               | PLLA $\alpha'_{203}$      | 15.2                       | 0.41          |
| 90            | PLLA $\alpha'_{110/200}$  | 13.3                       | 0.47          |
|               | PLLA $\alpha'_{203}$      | 15.2                       | 0.41          |
| 100           | PLLA $\alpha_{110/200}$   | 13.5                       | 0.47          |
|               | PLLA $\alpha_{203}$       | 15.3                       | 0.41          |
| 110           | PLLA $\alpha_{110/200}$   | 13.5                       | 0.47          |
|               | PLLA $\alpha_{203}$       | 15.3                       | 0.41          |
| 120           | PLLA $\alpha_{110/200}$   | 13.5                       | 0.47          |
|               | PLLA $\alpha_{203}$       | 15.3                       | 0.41          |

<sup>a</sup> $d$  was evaluated from the  $q$  value of characteristic reflection by Bragg equation ( $d = 2\pi/q$ ).
